# Supplementary material for: Long-persistent far-UVC light emission in Pr3+-doped Sr2P2O7 phosphor for microbial sterilization
Source: Royal Society of Chemistry journal article supplement (doi:10.1039/d3qi01253k), 2023-01-01
Supplement: d3qi01253k1.pdf [file d3qi01253k1.pdf]

## Supporting Information

### **Long-persistent far-UVC light emission in Pr<sup>3+</sup>-doped Sr<sub>2</sub>P<sub>2</sub>O<sub>7</sub> phosphor for microbial sterilization**

Yi Zhang,<sup>a</sup> Shao Yan,<sup>a</sup> Fang Xiao,<sup>\*b</sup> Xihui Shan,<sup>a</sup> Xulong Lv,<sup>a</sup> Weili Wang<sup>a</sup> and Yanjie Liang<sup>\*a</sup>

<sup>a</sup>*Key Laboratory for Liquid-Solid Structure Evolution and Processing of Materials, Ministry of Education, Shandong University, Jinan 250061, China*

<sup>b</sup>*Department of Cadres Medical Care and Geriatrics, the Second Hospital of Shandong University, Jinan 250033, China*

\*Corresponding author: Yanjie Liang, Fang Xiao

E-mail: [yanjie.liang@sdu.edu.cn](mailto:yanjie.liang@sdu.edu.cn); [xiaofangqshdd@163.com](mailto:xiaofangqshdd@163.com).

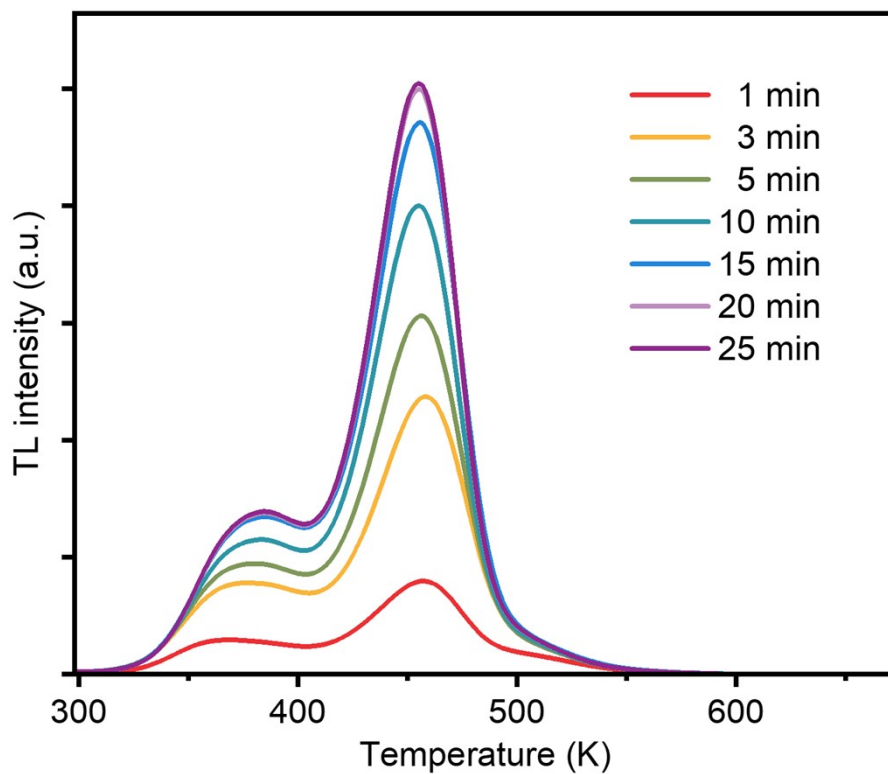

**Figure S1.** Thermoluminescence spectra of the Sr<sub>2</sub>P<sub>2</sub>O<sub>7</sub>:Pr<sup>3+</sup> phosphor with varying the excitation duration of X-ray beam from 1 min to 25 min.

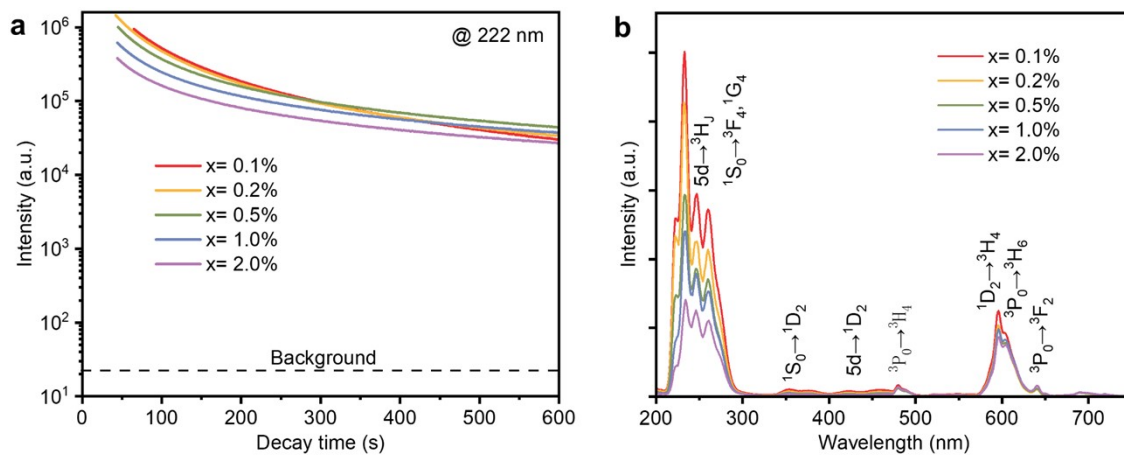

**Figure S2.** Effects of Pr<sup>3+</sup> doping concentration on the persistent luminescence performance of Sr<sub>2</sub>P<sub>2</sub>O<sub>7</sub>:Pr<sup>3+</sup> phosphors. (a) Persistent luminescence decay curves, and (b) persistent luminescence emission spectra of the Sr<sub>2-x</sub>P<sub>2</sub>O<sub>7</sub>:xPr<sup>3+</sup> (x = 0.001, 0.002, 0.005, 0.01, 0.02) phosphors. The samples were pre-irradiated by X-ray for 20 min.

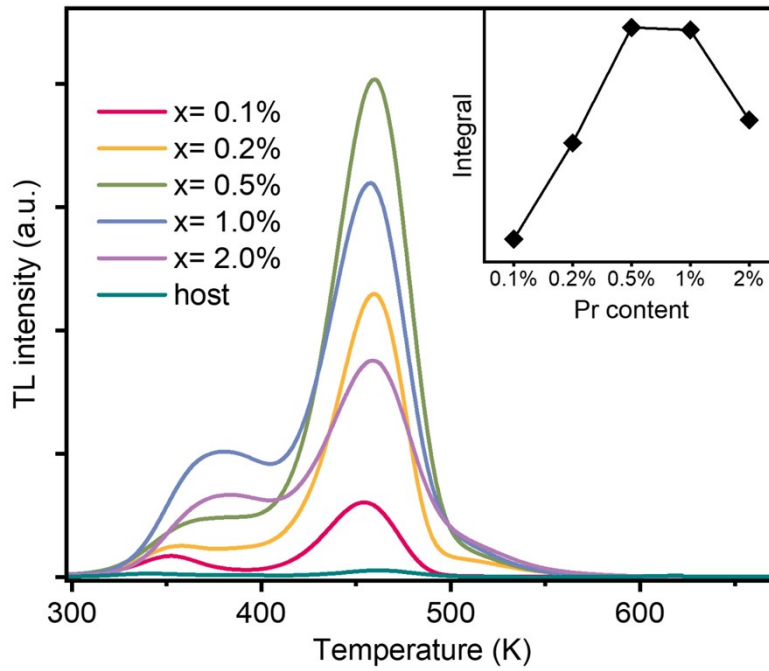

**Figure S3.** TL curves of the  $\text{Sr}_{2-x}\text{P}_2\text{O}_7:x\text{Pr}^{3+}$  ( $x = 0, 0.001, 0.002, 0.005, 0.01, 0.02$ ) phosphors. The samples were pre-irradiated by X-ray for 20 min.

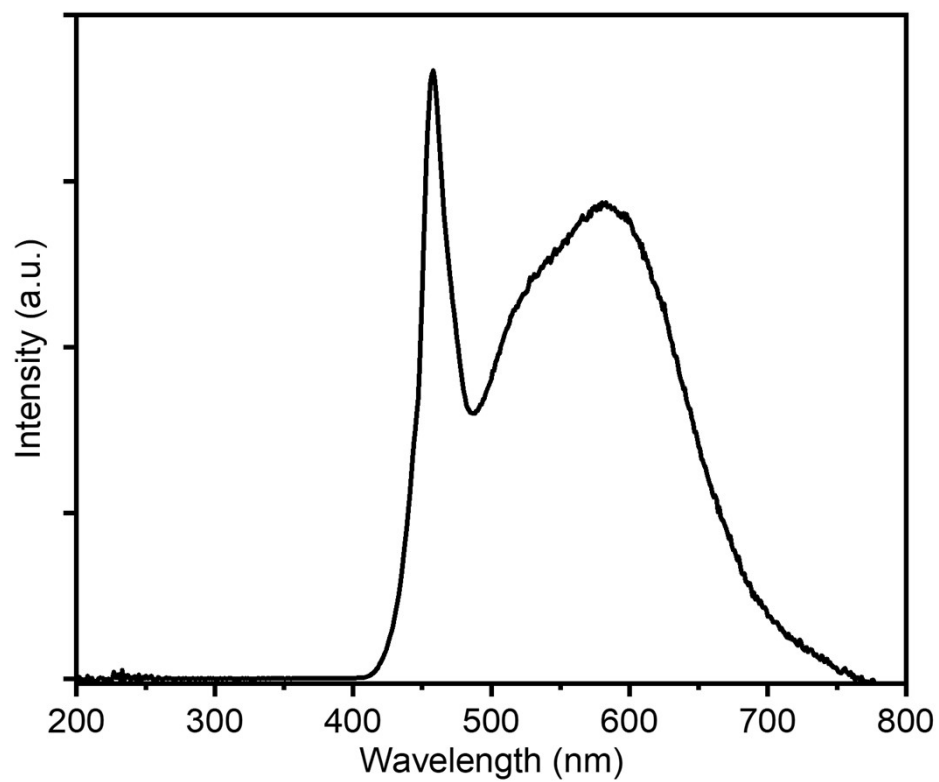

**Figure S4.** The emission spectrum of the used commercial white LED.

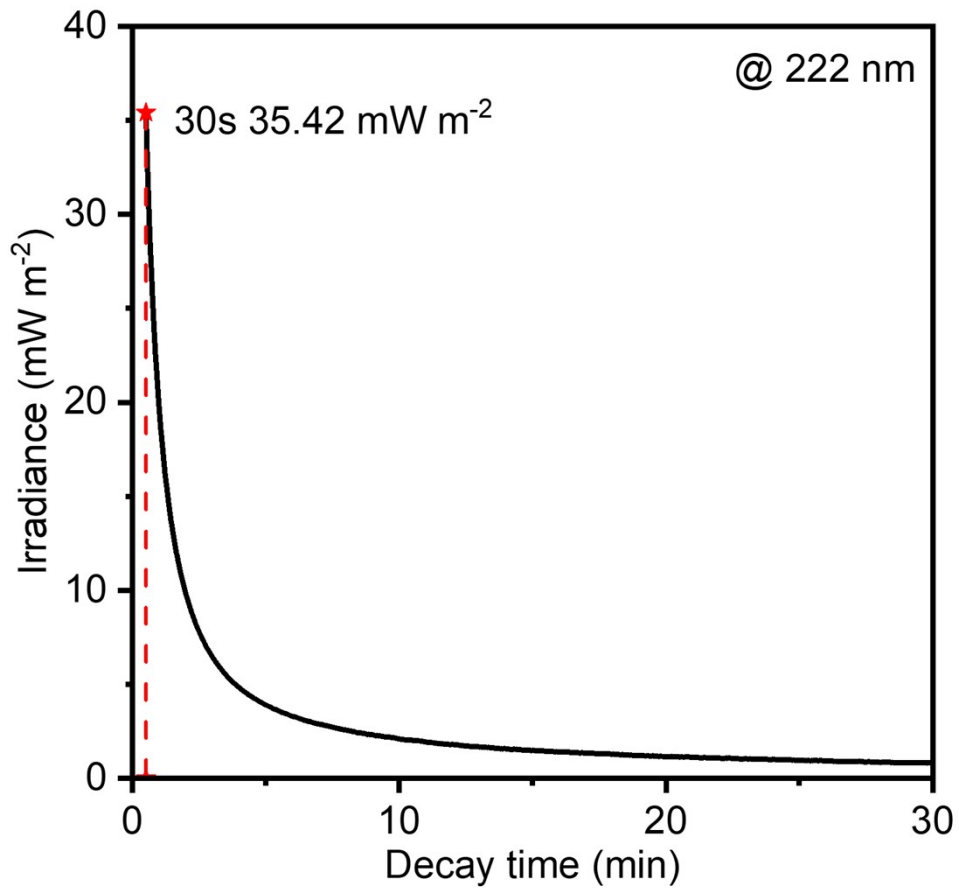

**Figure S5.** Far-UVC persistent luminescence power density decay curve of the SPO:0.005Pr<sup>3+</sup> phosphor measured by Newport power meter. The sample was pre-irradiated by X-ray for 20 min.

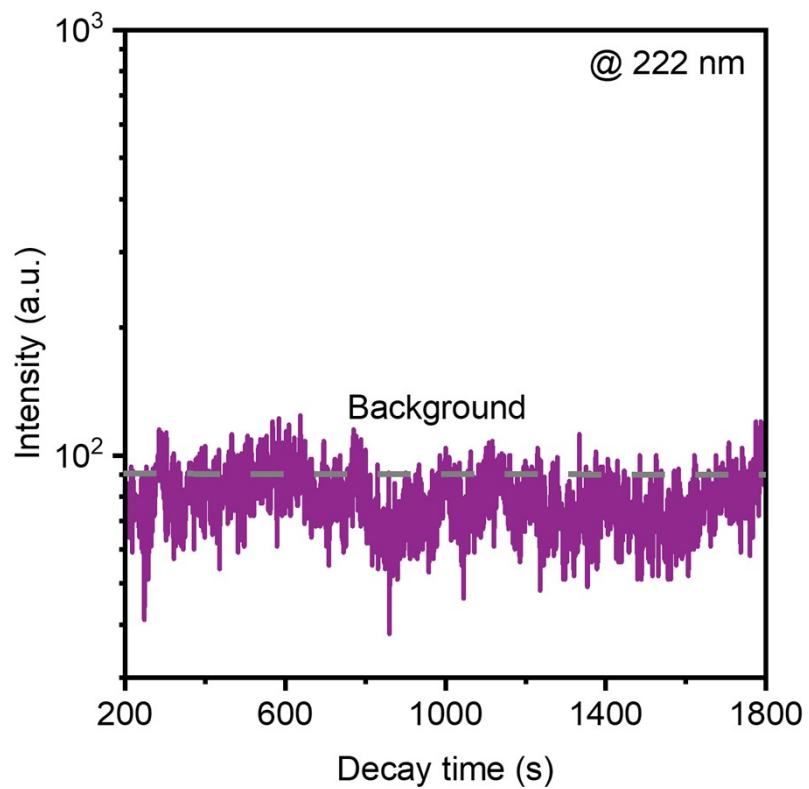

**Figure S6.** Persistent luminescence decay curve of the SPO:0.005Pr<sup>3+</sup> phosphor at 77 K. The sample was pre-irradiated by X-ray for 20 min at room temperature.

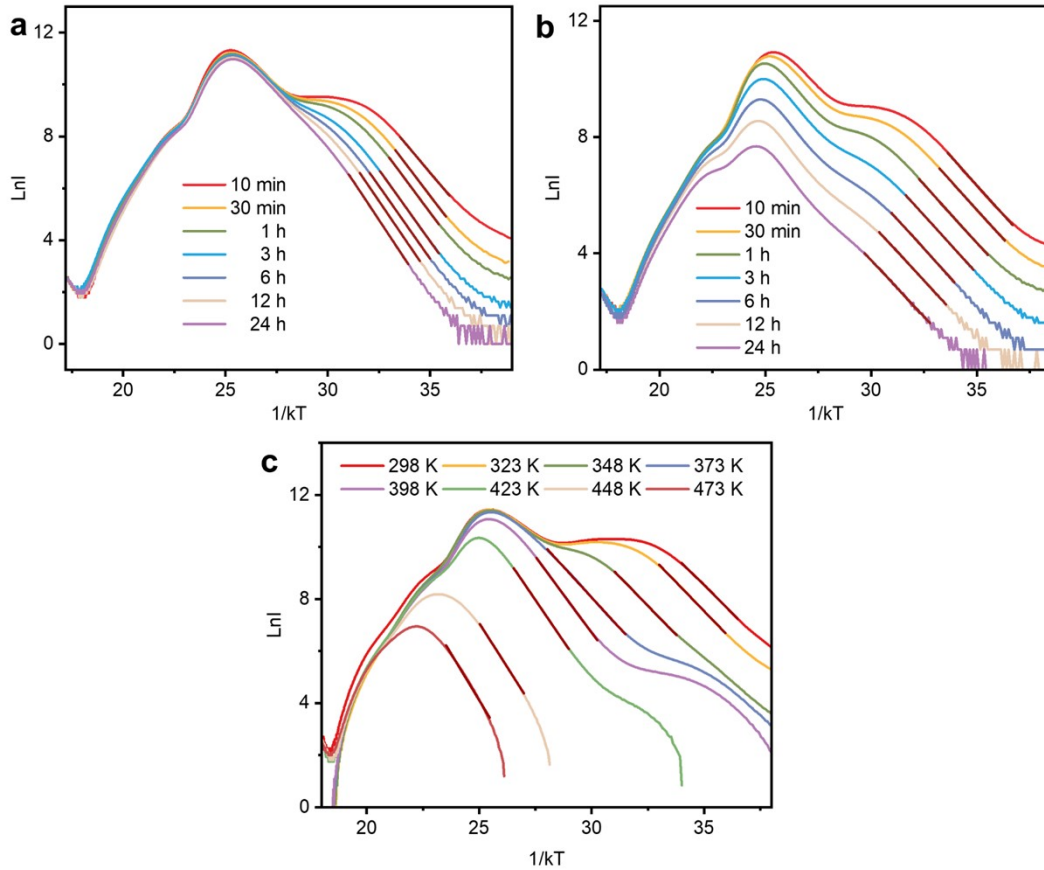

**Figure S7.** (a) Initial rising analysis for the TL curves of the SPO:0.005Pr<sup>3+</sup> phosphor at different decay instants in the darkness after X-ray charging. (b) Initial rising analysis for the TL curves of the SPO:0.005Pr<sup>3+</sup> phosphor upon white LED (300 lux) photostimulation. (c) Initial rising analysis for the TL curves of the SPO:0.005Pr<sup>3+</sup> phosphor with thermal cleaning procedure. The red lines represent the fitting results. The samples were pre-irradiated by X-ray for 20 min.



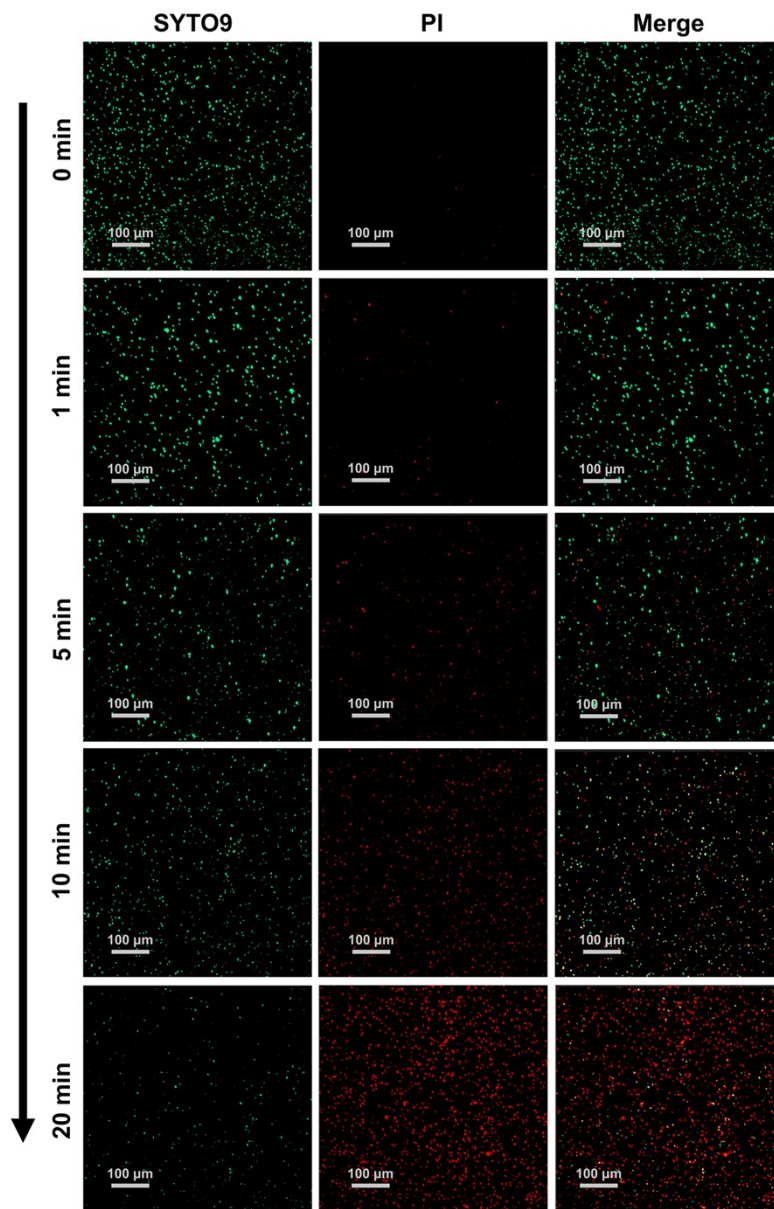

**Figure S8.** Confocal laser scanning micrograph of MRSA after irradiation of the SPO:0.005Pr<sup>3+</sup> samples. The samples were pre-irradiated by X-ray for different times (0 min, 1 min, 5 min, 10 min, 20 min), then covered on the top of the 48 wells plate for 30 min.

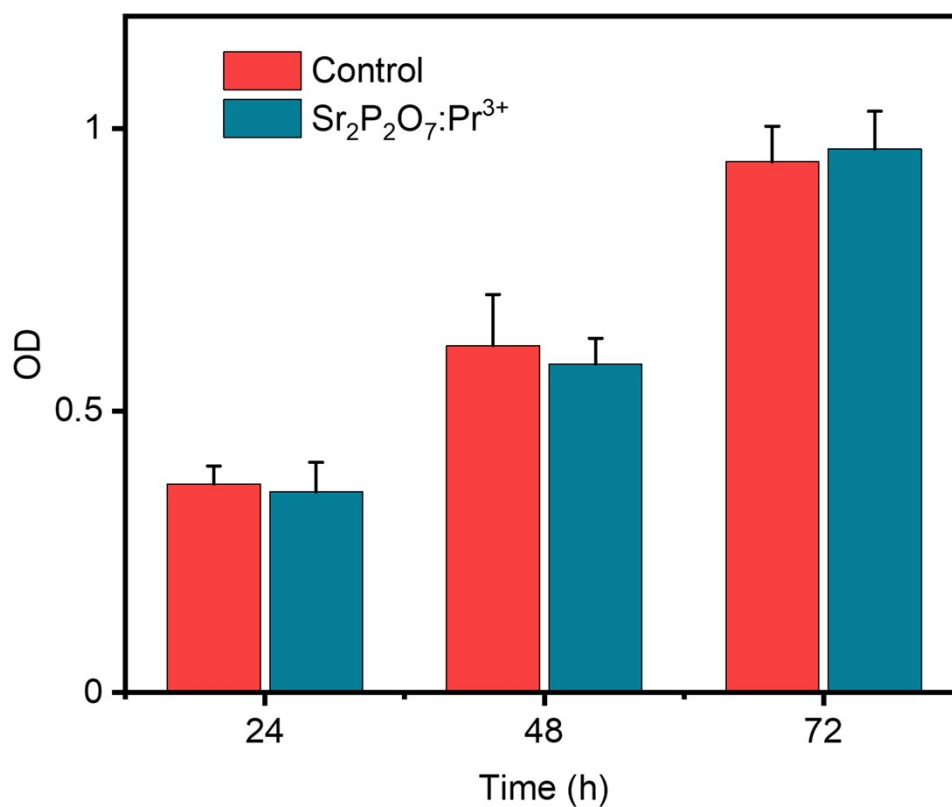

**Figure S9.** Cytotoxic effects of the SPO:0.005Pr<sup>3+</sup> phosphor on mouse Dermal Fibroblasts (mDF) cells. OD value is showing for cells incubated with and without SPO:0.005Pr<sup>3+</sup> phosphors. Bars represent the mean and standard deviation of threefold independent experiments.

**Table S1.** Refined structural parameters and cell parameter values of Sr<sub>2</sub>P<sub>2</sub>O<sub>7</sub>:Pr<sup>3+</sup> from the Rietveld refinement.

| Formula             | Sr <sub>2</sub> P <sub>2</sub> O <sub>7</sub> :Pr <sup>3+</sup>                          |           |          |           |         |
|---------------------|------------------------------------------------------------------------------------------|-----------|----------|-----------|---------|
| Crystal system      | Orthorhombic                                                                             |           |          |           |         |
| Space group         | <i>Pnma</i>                                                                              |           |          |           |         |
| Cell parameters     | $a = 8.91161(8) \text{ \AA}$ $b = 5.40472(6) \text{ \AA}$ $c = 13.15116(13) \text{ \AA}$ |           |          |           |         |
|                     | Alpha = 90°    Beta = 90°    Gamma = 90°                                                 |           |          |           |         |
| Cell volume         | $V = 633.422(11) \text{ \AA}^3$                                                          |           |          |           |         |
| Z                   | 4                                                                                        |           |          |           |         |
| Reliability factors | $R_p = 5.53\%$ , $R_{wp} = 7.94\%$ and $\chi^2 = 2.739$                                  |           |          |           |         |
| Atom                | x/a                                                                                      | y/b       | z/c      | Occupancy | Uiso    |
| Sr1                 | 0.169998                                                                                 | 0.250000  | 0.739753 | 0.9537    | 0.02841 |
| Sr2                 | 0.124487                                                                                 | 0.250000  | 0.414952 | 0.9260    | 0.01966 |
| P1                  | -0.033342                                                                                | -0.250000 | 0.818322 | 1.0786    | 0.04716 |
| P2                  | -0.281963                                                                                | -0.250000 | 0.961531 | 0.9938    | 0.03128 |
| O1                  | -0.086522                                                                                | -0.250000 | 0.938211 | 1.0853    | 0.06539 |
| O2                  | -0.080897                                                                                | -0.008017 | 0.765667 | 0.9054    | 0.03266 |
| O3                  | -0.344362                                                                                | -0.015821 | 0.924487 | 0.9888    | 0.04684 |
| O4                  | -0.271164                                                                                | -0.250000 | 1.079729 | 1.1720    | 0.08073 |
| O5                  | 0.135498                                                                                 | -0.250000 | 0.829587 | 0.9757    | 0.05268 |

**Table S2.** Far-UVC persistent luminescence power density of the SPO:0.005Pr<sup>3+</sup> phosphor measured by Newport power meter. The sample was pre-irradiated by X-ray for 20 min.

| Decay time (s) | Radiance (mW m <sup>-2</sup> ) |
|----------------|--------------------------------|
| 30             | 35.42                          |
| 60             | 19.62                          |
| 300            | 3.90                           |
| 600            | 2.09                           |
| 1200           | 1.15                           |
| 1800           | 0.82                           |

**Table S3.** Persistent luminescence power densities comparison with the other reported UVC persistent phosphors.

| Material                                                           | Irradiance (mW m <sup>-2</sup> ) | Emission wavelength (nm) | Ref.      |
|--------------------------------------------------------------------|----------------------------------|--------------------------|-----------|
| Cs <sub>2</sub> NaYF <sub>6</sub> :Pr <sup>3+</sup>                | 14.9 (30 s)                      | 270                      | 1         |
| Ca <sub>2</sub> Al <sub>2</sub> SiO <sub>7</sub> :Pr <sup>3+</sup> | 4.8 (10 s)                       | 268                      | 2         |
| Lu <sub>2</sub> SiO <sub>5</sub> :Pr <sup>3+</sup>                 | 6.98 (15 s)                      | 270                      | 3         |
| LiLuSiO <sub>4</sub> :Pr <sup>3+</sup>                             | 12.47 (10 s)                     | 280                      | 4         |
| Sr <sub>2</sub> P <sub>2</sub> O <sub>7</sub> :Pr <sup>3+</sup>    | 35.42 (30 s)                     | 222                      | This work |

#### Reference

- (1) Y. M. Yang, Z. Y. Li, J. Y. Zhang, Y. Lu, S. Q. Guo, Q. Zhao, X. Wang, Z. J. Yong, H. Li, J. P. Ma, Y. Kuroiwa, C. Moriyoshi, L. L. Hu, L. Y. Zhang, L. R. Zheng and H. T. Sun, X-ray-activated long persistent phosphors featuring strong UVC afterglow emissions, *Light: Sci. Appl.*, 2018, **7**, 88.
- (2) X. Wang, Y. Chen, F. Liu and Z. Pan, Solar-blind ultraviolet-C persistent luminescence phosphors, *Nat. Commun.*, 2020, **11**, 2040.
- (3) S. Yan, Y. Liang, Y. Chen, J. Liu, D. Chen and Z. Pan, Ultraviolet-C persistent luminescence from the Lu<sub>2</sub>SiO<sub>5</sub>:Pr<sup>3+</sup> persistent phosphor for solar-blind optical tagging, *Dalton Trans.*, 2021, **50**, 8457–8466.
- (4) S. Yan, Y. Liang, Y. Zhang, B. Lou, J. Liu, D. Chen, S. Miao and C. Ma, A considerable improvement of long-persistent luminescence in LiLuSiO<sub>4</sub>:Pr<sup>3+</sup> phosphors by Sm<sup>3+</sup> co-doping for optical tagging applications, *J. Mater. Chem. C*, 2022, **10**, 17343–17352.
